# Supplementary material for: A new principle of oligomerization of plant DEG7 protease based on interactions of degenerated protease domains
Source: PubMed Central journal article supplement — Biochem J. 2011 Mar 15;435(Pt 1):167–74. doi: 10.1042/BJ20101613 (PMC3194040; doi:10.1042/bj20101613), 2011-03-15
Supplement: bj4350167add.pdf [file bj4350167add.pdf]

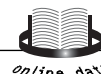

**SUPPLEMENTARY ONLINE DATA**

**A new principle of oligomerization of plant DEG7 protease based on interactions of degenerated protease domains**

Holger SCHUHMANN, Ulrike MOGG and Iwona ADAMSKA<sup>1</sup>

Department of Physiology and Plant Biochemistry, University of Konstanz, Universitätsstrasse 10, D-78457 Konstanz, Germany

**Table S1** DEG7 orthologues and their accession numbers (SwissProt Protein Database)

\*JGI protein ID, no entry in SwissProt Database; \*\*GenBank® accession number, no entry in SwissProt Database.

| Organism                                 | Accession number |
|------------------------------------------|------------------|
| <i>Arabidopsis thaliana</i>              | Q8RY22           |
| <i>Aspergillus nidulans</i>              | Q5B1Z4           |
| <i>Aspergillus niger</i>                 | A5AB13           |
| <i>Aspergillus oryzae</i>                | Q2TYB1           |
| <i>Aureococcus anophagefferens</i>       | 322*             |
| <i>Candida albicans</i>                  | Q5A946           |
| <i>Chlamydomonas reinhardtii</i>         | A8JH35           |
| <i>Chlorella</i> sp. NC64A               | 37665*           |
| <i>Emiliania huxleyi</i> (1)             | 452178*          |
| <i>Emiliania huxleyi</i> (2)             | 245118*          |
| <i>Gibberella zeae</i> (1)               | UPI000023D1E1    |
| <i>Gibberella zeae</i> (2)               | UPI000023F481    |
| <i>Glycine max</i>                       | AK287315**       |
| <i>Magnaporthe grisea</i>                | A4RJH4           |
| <i>Micromonas pusilla</i>                | 35996*           |
| <i>Neosartorya fischeri</i>              | A1DP85           |
| <i>Neurospora crassa</i>                 | Q7S9D2           |
| <i>Oryza sativa</i>                      | B9F2C1           |
| <i>Penicillium marnettei</i>             | B6QAL6           |
| <i>Phaeosphaeria nodorum</i>             | Q0UY70           |
| <i>Physcomitrella patens</i> (1)         | A9TIB2           |
| <i>Physcomitrella patens</i> (2)         | A9RQ61           |
| <i>Phytophthora capsici</i>              | 27218*           |
| <i>Phytophthora soja</i> (1)             | 133655*          |
| <i>Phytophthora soja</i> (2)             | 199402*          |
| <i>Podospora anserina</i>                | B2ASP9           |
| <i>Populus trichocarpa</i> (1)           | B9GV35           |
| <i>Populus trichocarpa</i> (2)           | B9H390           |
| <i>Populus trichocarpa</i> (3)           | B9H391           |
| <i>Pyrenophora tritici-repentis</i>      | B2WNT3           |
| <i>Saccharomyces cerevisiae</i>          | P53920           |
| <i>Schizosaccharomyces japonicus</i> (1) | B6K3R7           |
| <i>Schizosaccharomyces japonicus</i> (2) | B6JWG1           |
| <i>Schizosaccharomyces pombe</i> (1)     | Q9P7S1           |
| <i>Schizosaccharomyces pombe</i> (2)     | 074325           |
| <i>Sclerotinia sclerotiorum</i>          | A7E9G4           |
| <i>Selaginella moellendorffii</i>        | 165477*          |
| <i>Solanum lycopersicum</i>              | AK321684**       |
| <i>Sorghum bicolor</i>                   | 5004613*         |
| <i>Vanderwaltozyma polyspora</i>         | A7TG13           |
| <i>Volvox carteri</i>                    | 79278*           |

**Table S2** List of oligonucleotides used as PCR primers

| Name | Sequence (5' → 3')                     |
|------|----------------------------------------|
| 0724 | GGTACTAAAGGTGGTTTCAGCTGGTTCCTCCGTCATTG |
| 0725 | CAATGACGGGAGAACCAGCTGAACCACCTTAGTACC   |
| 0734 | TATGTCGACTTACTGCAAGGCTTTC              |
| 0740 | CACCATGGGAGATCCGTTGGA                  |
| 0747 | GCGCCGCGGTACTGCAAGGCTTTC               |
| 0765 | GCGTTACTTATCCGTCGCGGAGTC               |
| 0767 | GCGTTATGAGTGTAAATCTTGACTGATA           |
| 0771 | GCGTTATTGTTCTTTGCTTCTGAGCC             |
| 0774 | CACCTCCGTTGCCACCGCTGAAGATTG            |
| 0775 | CACCGATAAGCCAAAAGCAGTTCATATTC          |
| 0776 | CACCTCAAAGCCCGGAGTTTGGTC               |
| 0777 | CACCGAACCATGCATGAAGTGAATG              |
| 0793 | CACCGGAGTGAATTTAAATCTGATG              |
| 0797 | CGCTTATCCATTTCACCGGTTATGATT            |
| 0799 | CGCTTAATCTTTTCAGAGTCAACTACTC           |

<sup>1</sup> To whom correspondence should be addressed (e-mail iwona.adamska@uni-konstanz.de).

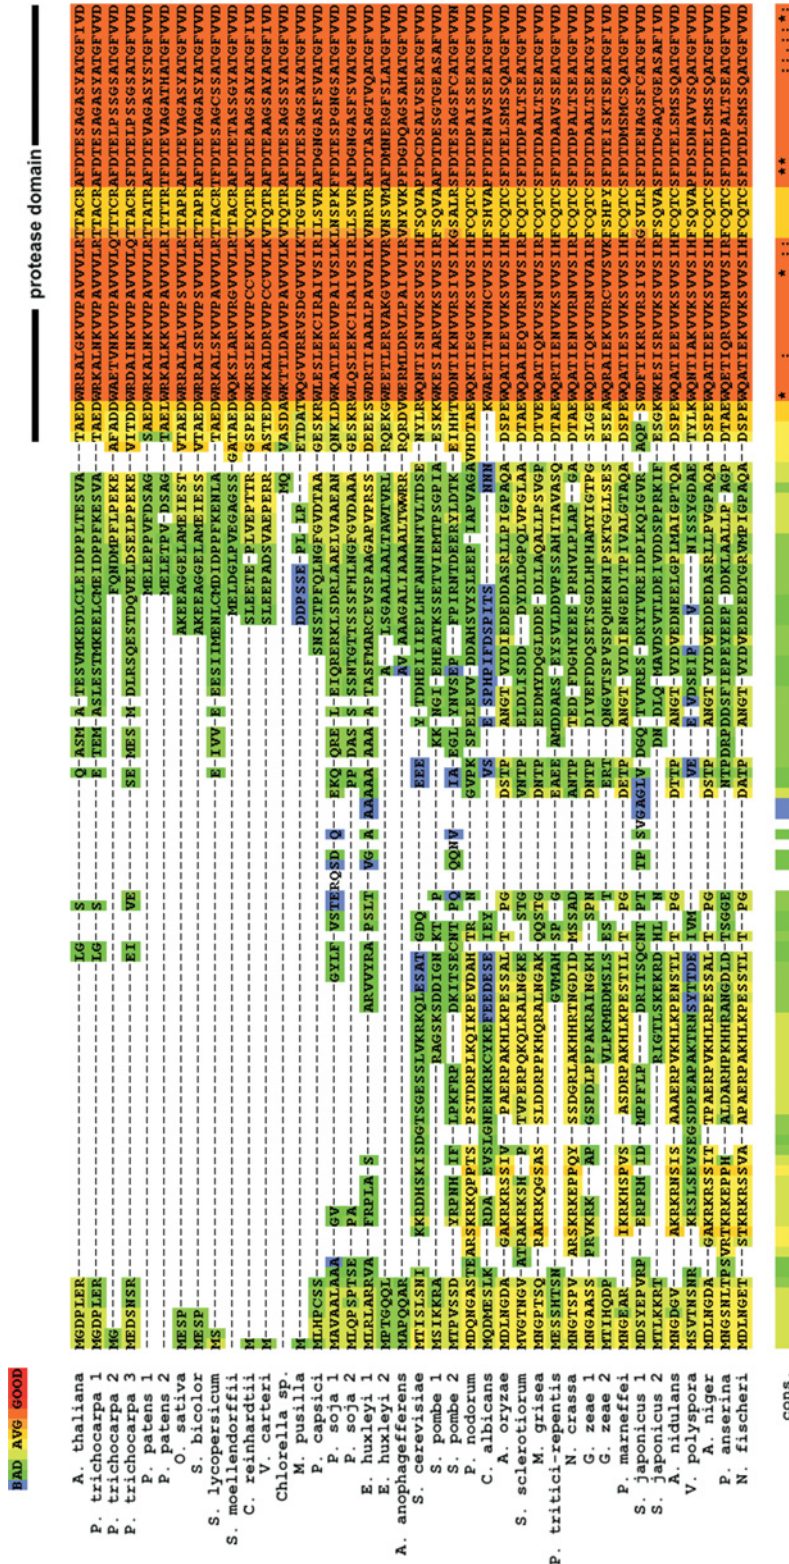

**Figure S1 M-Coffee multiple sequence alignment of the amino acid sequences of the DEG7 orthologues used in the present study**

The approximate position of the domains (as determined by using the InterProScan and HHPred prediction servers) are indicated by black bars on top of the alignment. Conserved residues of catalytic triad are shown as blue letters above the alignment. For full names of organisms, see Supplementary Table S1. cons., consensus; \*, identity; :, conserved replacement; ., non-conserved replacement.

Continues...

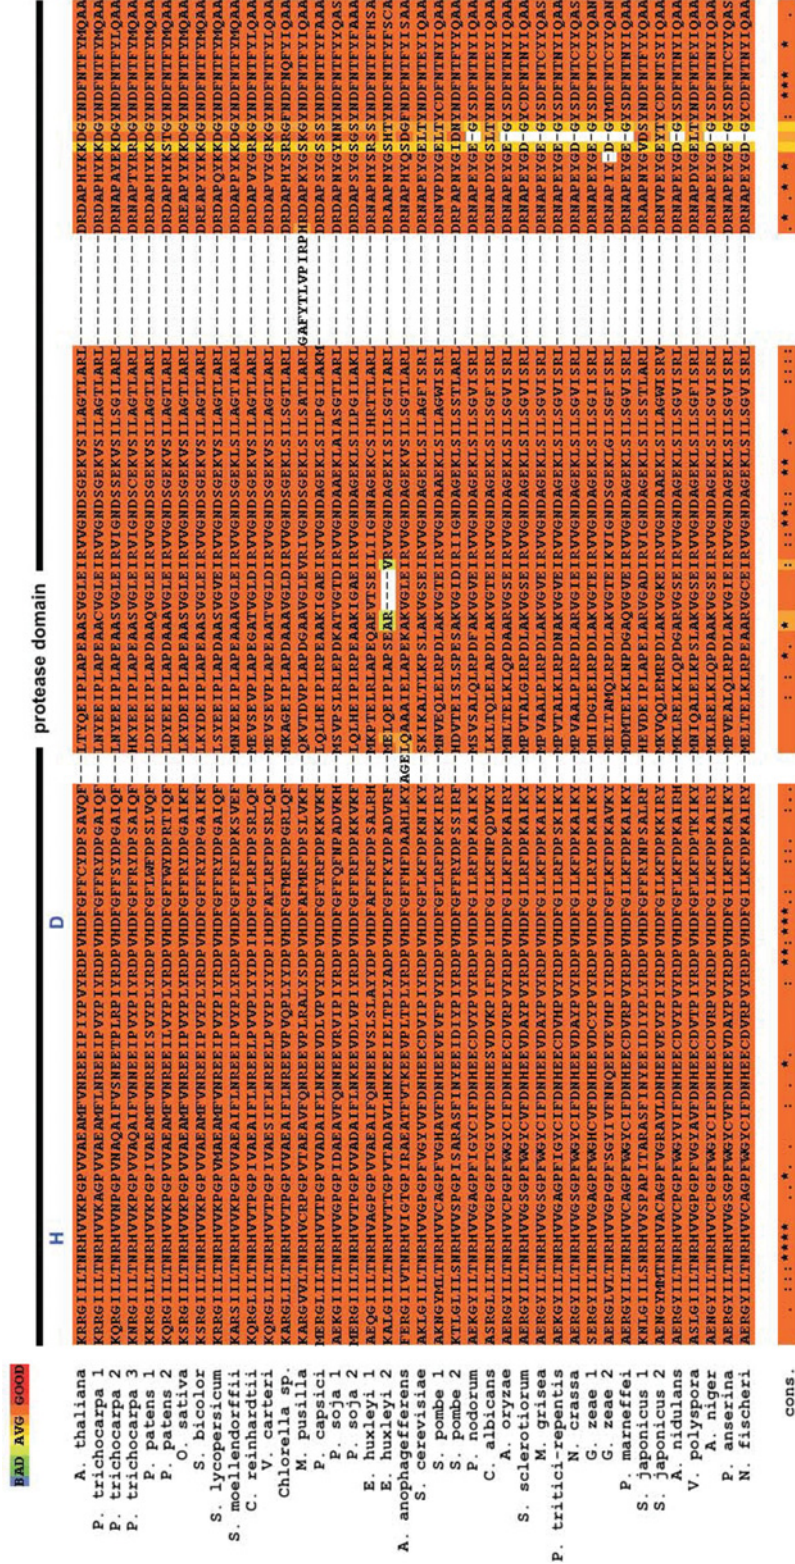

Figure S1 Continued



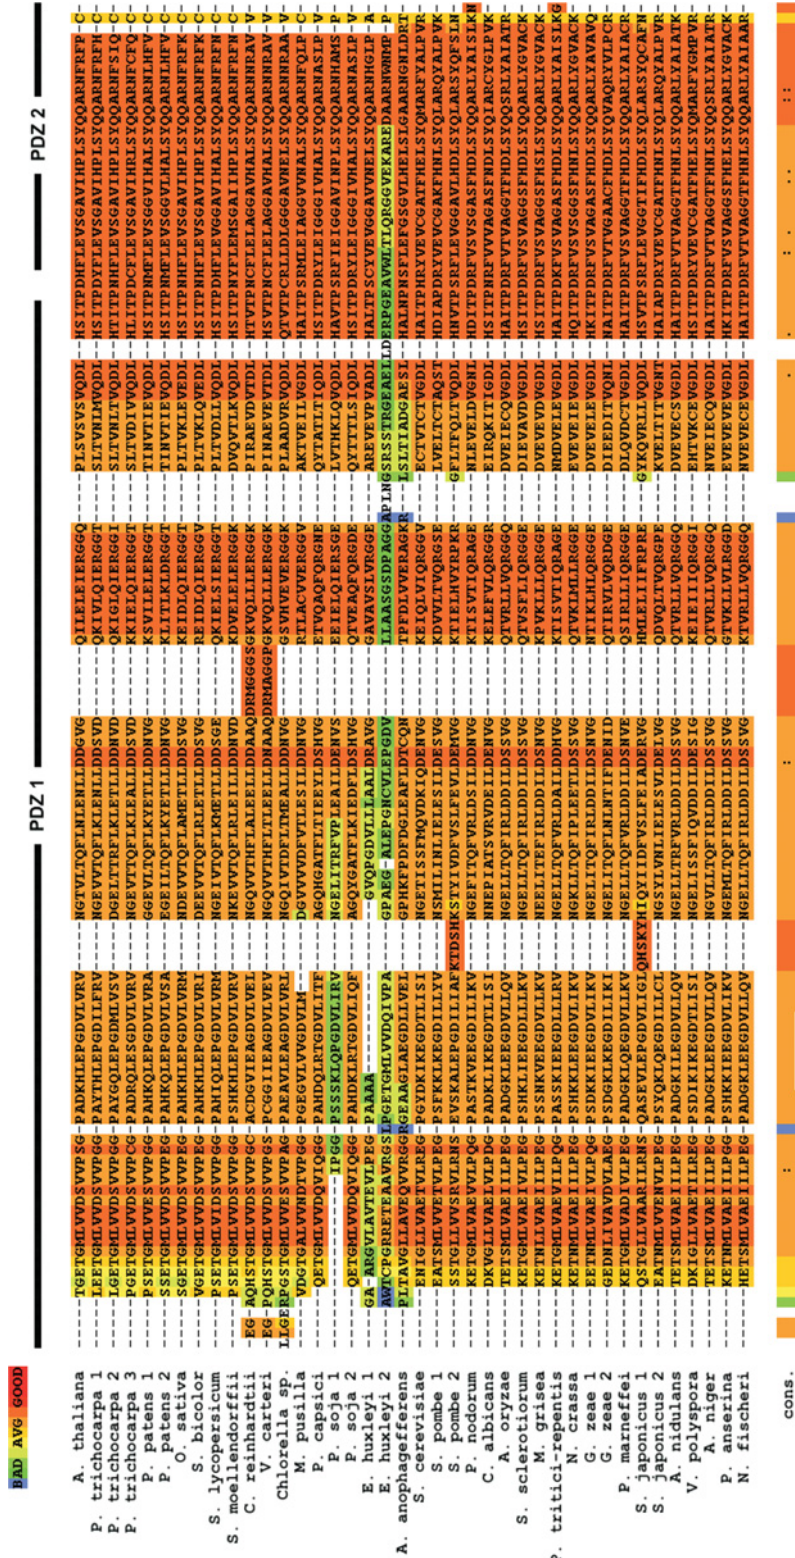

cons.

Figure S1 Continued

PAD AVG GOOD

PDZ

|                     |                                                                        |                                                                        |           |           |    |          |
|---------------------|------------------------------------------------------------------------|------------------------------------------------------------------------|-----------|-----------|----|----------|
| A. thaliana         | AGVPRHAI IKKVAHEEISISGDIASVLSKLSRGARVPEVMSHTDRHRKSVLTIIDHHEWAPQLYTRHDS | GIHQDAKP                                                               | AIPEASVSP | ST        | CH | KGF      |
| P. trichocarpa 1    | GLVYSEFGYMLFR                                                          | AGVPRHAI IKKVAHEEISISGDIASVLSKLSRGARVPEVMSHTDRHRKSVLTIIDHHEWAPQLYTRHDS | GLWTKAP   | AIQDLSIQI | SS | AVKTHGGS |
| P. trichocarpa 2    | GLVYVAEPGYMLQR                                                         | AGVPRHAI IKKVAHEEISISGDIASVLSKLSRGARVPEVMSHTDRHRKSVLTIIDHHEWAPQLYTRHDS | GLWTKAP   | AIQDLSIQI | SS | AVKTHGGS |
| P. trichocarpa 3    | GLVYVAEPGYMLQR                                                         | AGVPRHAI IKKVAHEEISISGDIASVLSKLSRGARVPEVMSHTDRHRKSVLTIIDHHEWAPQLYTRHDS | GLWTKAP   | AIQDLSIQI | SS | AVKTHGGS |
| P. patens 1         | GLVYVAEPGYMLQR                                                         | AGVPRHAI IKKVAHEEISISGDIASVLSKLSRGARVPEVMSHTDRHRKSVLTIIDHHEWAPQLYTRHDS | GLWTKAP   | AIQDLSIQI | SS | AVKTHGGS |
| P. patens 2         | GLVYVAEPGYMLQR                                                         | AGVPRHAI IKKVAHEEISISGDIASVLSKLSRGARVPEVMSHTDRHRKSVLTIIDHHEWAPQLYTRHDS | GLWTKAP   | AIQDLSIQI | SS | AVKTHGGS |
| O. sativa           | GLVYVAEPGYMLQR                                                         | AGVPRHAI IKKVAHEEISISGDIASVLSKLSRGARVPEVMSHTDRHRKSVLTIIDHHEWAPQLYTRHDS | GLWTKAP   | AIQDLSIQI | SS | AVKTHGGS |
| S. bicolor          | GLVYVAEPGYMLQR                                                         | AGVPRHAI IKKVAHEEISISGDIASVLSKLSRGARVPEVMSHTDRHRKSVLTIIDHHEWAPQLYTRHDS | GLWTKAP   | AIQDLSIQI | SS | AVKTHGGS |
| S. lycopersicum     | GLVYVAEPGYMLQR                                                         | AGVPRHAI IKKVAHEEISISGDIASVLSKLSRGARVPEVMSHTDRHRKSVLTIIDHHEWAPQLYTRHDS | GLWTKAP   | AIQDLSIQI | SS | AVKTHGGS |
| S. moellendorffii   | GLVYVAEPGYMLQR                                                         | AGVPRHAI IKKVAHEEISISGDIASVLSKLSRGARVPEVMSHTDRHRKSVLTIIDHHEWAPQLYTRHDS | GLWTKAP   | AIQDLSIQI | SS | AVKTHGGS |
| C. reinhardtii      | GLVYVAEPGYMLQR                                                         | AGVPRHAI IKKVAHEEISISGDIASVLSKLSRGARVPEVMSHTDRHRKSVLTIIDHHEWAPQLYTRHDS | GLWTKAP   | AIQDLSIQI | SS | AVKTHGGS |
| V. carteri          | GLVYVAEPGYMLQR                                                         | AGVPRHAI IKKVAHEEISISGDIASVLSKLSRGARVPEVMSHTDRHRKSVLTIIDHHEWAPQLYTRHDS | GLWTKAP   | AIQDLSIQI | SS | AVKTHGGS |
| Chlorella sp.       | GLVYVAEPGYMLQR                                                         | AGVPRHAI IKKVAHEEISISGDIASVLSKLSRGARVPEVMSHTDRHRKSVLTIIDHHEWAPQLYTRHDS | GLWTKAP   | AIQDLSIQI | SS | AVKTHGGS |
| M. pusilla          | GLVYVAEPGYMLQR                                                         | AGVPRHAI IKKVAHEEISISGDIASVLSKLSRGARVPEVMSHTDRHRKSVLTIIDHHEWAPQLYTRHDS | GLWTKAP   | AIQDLSIQI | SS | AVKTHGGS |
| P. capsici          | GLVYVAEPGYMLQR                                                         | AGVPRHAI IKKVAHEEISISGDIASVLSKLSRGARVPEVMSHTDRHRKSVLTIIDHHEWAPQLYTRHDS | GLWTKAP   | AIQDLSIQI | SS | AVKTHGGS |
| P. soja 1           | GLVYVAEPGYMLQR                                                         | AGVPRHAI IKKVAHEEISISGDIASVLSKLSRGARVPEVMSHTDRHRKSVLTIIDHHEWAPQLYTRHDS | GLWTKAP   | AIQDLSIQI | SS | AVKTHGGS |
| P. soja 2           | GLVYVAEPGYMLQR                                                         | AGVPRHAI IKKVAHEEISISGDIASVLSKLSRGARVPEVMSHTDRHRKSVLTIIDHHEWAPQLYTRHDS | GLWTKAP   | AIQDLSIQI | SS | AVKTHGGS |
| E. huxleyi 1        | GLVYVAEPGYMLQR                                                         | AGVPRHAI IKKVAHEEISISGDIASVLSKLSRGARVPEVMSHTDRHRKSVLTIIDHHEWAPQLYTRHDS | GLWTKAP   | AIQDLSIQI | SS | AVKTHGGS |
| E. huxleyi 2        | GLVYVAEPGYMLQR                                                         | AGVPRHAI IKKVAHEEISISGDIASVLSKLSRGARVPEVMSHTDRHRKSVLTIIDHHEWAPQLYTRHDS | GLWTKAP   | AIQDLSIQI | SS | AVKTHGGS |
| A. anophagefferens  | GLVYVAEPGYMLQR                                                         | AGVPRHAI IKKVAHEEISISGDIASVLSKLSRGARVPEVMSHTDRHRKSVLTIIDHHEWAPQLYTRHDS | GLWTKAP   | AIQDLSIQI | SS | AVKTHGGS |
| S. cerevisiae       | GLVYVAEPGYMLQR                                                         | AGVPRHAI IKKVAHEEISISGDIASVLSKLSRGARVPEVMSHTDRHRKSVLTIIDHHEWAPQLYTRHDS | GLWTKAP   | AIQDLSIQI | SS | AVKTHGGS |
| S. pombe 1          | GLVYVAEPGYMLQR                                                         | AGVPRHAI IKKVAHEEISISGDIASVLSKLSRGARVPEVMSHTDRHRKSVLTIIDHHEWAPQLYTRHDS | GLWTKAP   | AIQDLSIQI | SS | AVKTHGGS |
| S. pombe 2          | GLVYVAEPGYMLQR                                                         | AGVPRHAI IKKVAHEEISISGDIASVLSKLSRGARVPEVMSHTDRHRKSVLTIIDHHEWAPQLYTRHDS | GLWTKAP   | AIQDLSIQI | SS | AVKTHGGS |
| P. nodorum          | GLVYVAEPGYMLQR                                                         | AGVPRHAI IKKVAHEEISISGDIASVLSKLSRGARVPEVMSHTDRHRKSVLTIIDHHEWAPQLYTRHDS | GLWTKAP   | AIQDLSIQI | SS | AVKTHGGS |
| C. albicans         | GLVYVAEPGYMLQR                                                         | AGVPRHAI IKKVAHEEISISGDIASVLSKLSRGARVPEVMSHTDRHRKSVLTIIDHHEWAPQLYTRHDS | GLWTKAP   | AIQDLSIQI | SS | AVKTHGGS |
| A. oryzae           | GLVYVAEPGYMLQR                                                         | AGVPRHAI IKKVAHEEISISGDIASVLSKLSRGARVPEVMSHTDRHRKSVLTIIDHHEWAPQLYTRHDS | GLWTKAP   | AIQDLSIQI | SS | AVKTHGGS |
| S. sclerotiorum     | GLVYVAEPGYMLQR                                                         | AGVPRHAI IKKVAHEEISISGDIASVLSKLSRGARVPEVMSHTDRHRKSVLTIIDHHEWAPQLYTRHDS | GLWTKAP   | AIQDLSIQI | SS | AVKTHGGS |
| M. grisea           | GLVYVAEPGYMLQR                                                         | AGVPRHAI IKKVAHEEISISGDIASVLSKLSRGARVPEVMSHTDRHRKSVLTIIDHHEWAPQLYTRHDS | GLWTKAP   | AIQDLSIQI | SS | AVKTHGGS |
| P. tritici-repentis | GLVYVAEPGYMLQR                                                         | AGVPRHAI IKKVAHEEISISGDIASVLSKLSRGARVPEVMSHTDRHRKSVLTIIDHHEWAPQLYTRHDS | GLWTKAP   | AIQDLSIQI | SS | AVKTHGGS |
| N. crassa           | GLVYVAEPGYMLQR                                                         | AGVPRHAI IKKVAHEEISISGDIASVLSKLSRGARVPEVMSHTDRHRKSVLTIIDHHEWAPQLYTRHDS | GLWTKAP   | AIQDLSIQI | SS | AVKTHGGS |
| G. zeae 1           | GLVYVAEPGYMLQR                                                         | AGVPRHAI IKKVAHEEISISGDIASVLSKLSRGARVPEVMSHTDRHRKSVLTIIDHHEWAPQLYTRHDS | GLWTKAP   | AIQDLSIQI | SS | AVKTHGGS |
| G. zeae 2           | GLVYVAEPGYMLQR                                                         | AGVPRHAI IKKVAHEEISISGDIASVLSKLSRGARVPEVMSHTDRHRKSVLTIIDHHEWAPQLYTRHDS | GLWTKAP   | AIQDLSIQI | SS | AVKTHGGS |
| P. marneffii        | GLVYVAEPGYMLQR                                                         | AGVPRHAI IKKVAHEEISISGDIASVLSKLSRGARVPEVMSHTDRHRKSVLTIIDHHEWAPQLYTRHDS | GLWTKAP   | AIQDLSIQI | SS | AVKTHGGS |
| S. japonicus 1      | GLVYVAEPGYMLQR                                                         | AGVPRHAI IKKVAHEEISISGDIASVLSKLSRGARVPEVMSHTDRHRKSVLTIIDHHEWAPQLYTRHDS | GLWTKAP   | AIQDLSIQI | SS | AVKTHGGS |
| S. japonicus 2      | GLVYVAEPGYMLQR                                                         | AGVPRHAI IKKVAHEEISISGDIASVLSKLSRGARVPEVMSHTDRHRKSVLTIIDHHEWAPQLYTRHDS | GLWTKAP   | AIQDLSIQI | SS | AVKTHGGS |
| A. nidulans         | GLVYVAEPGYMLQR                                                         | AGVPRHAI IKKVAHEEISISGDIASVLSKLSRGARVPEVMSHTDRHRKSVLTIIDHHEWAPQLYTRHDS | GLWTKAP   | AIQDLSIQI | SS | AVKTHGGS |
| V. polyspora        | GLVYVAEPGYMLQR                                                         | AGVPRHAI IKKVAHEEISISGDIASVLSKLSRGARVPEVMSHTDRHRKSVLTIIDHHEWAPQLYTRHDS | GLWTKAP   | AIQDLSIQI | SS | AVKTHGGS |
| A. niger            | GLVYVAEPGYMLQR                                                         | AGVPRHAI IKKVAHEEISISGDIASVLSKLSRGARVPEVMSHTDRHRKSVLTIIDHHEWAPQLYTRHDS | GLWTKAP   | AIQDLSIQI | SS | AVKTHGGS |
| P. anserina         | GLVYVAEPGYMLQR                                                         | AGVPRHAI IKKVAHEEISISGDIASVLSKLSRGARVPEVMSHTDRHRKSVLTIIDHHEWAPQLYTRHDS | GLWTKAP   | AIQDLSIQI | SS | AVKTHGGS |
| N. fischeri         | GLVYVAEPGYMLQR                                                         | AGVPRHAI IKKVAHEEISISGDIASVLSKLSRGARVPEVMSHTDRHRKSVLTIIDHHEWAPQLYTRHDS | GLWTKAP   | AIQDLSIQI | SS | AVKTHGGS |

cons.

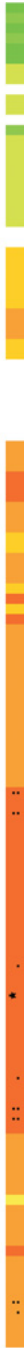

Figure S1 Continued

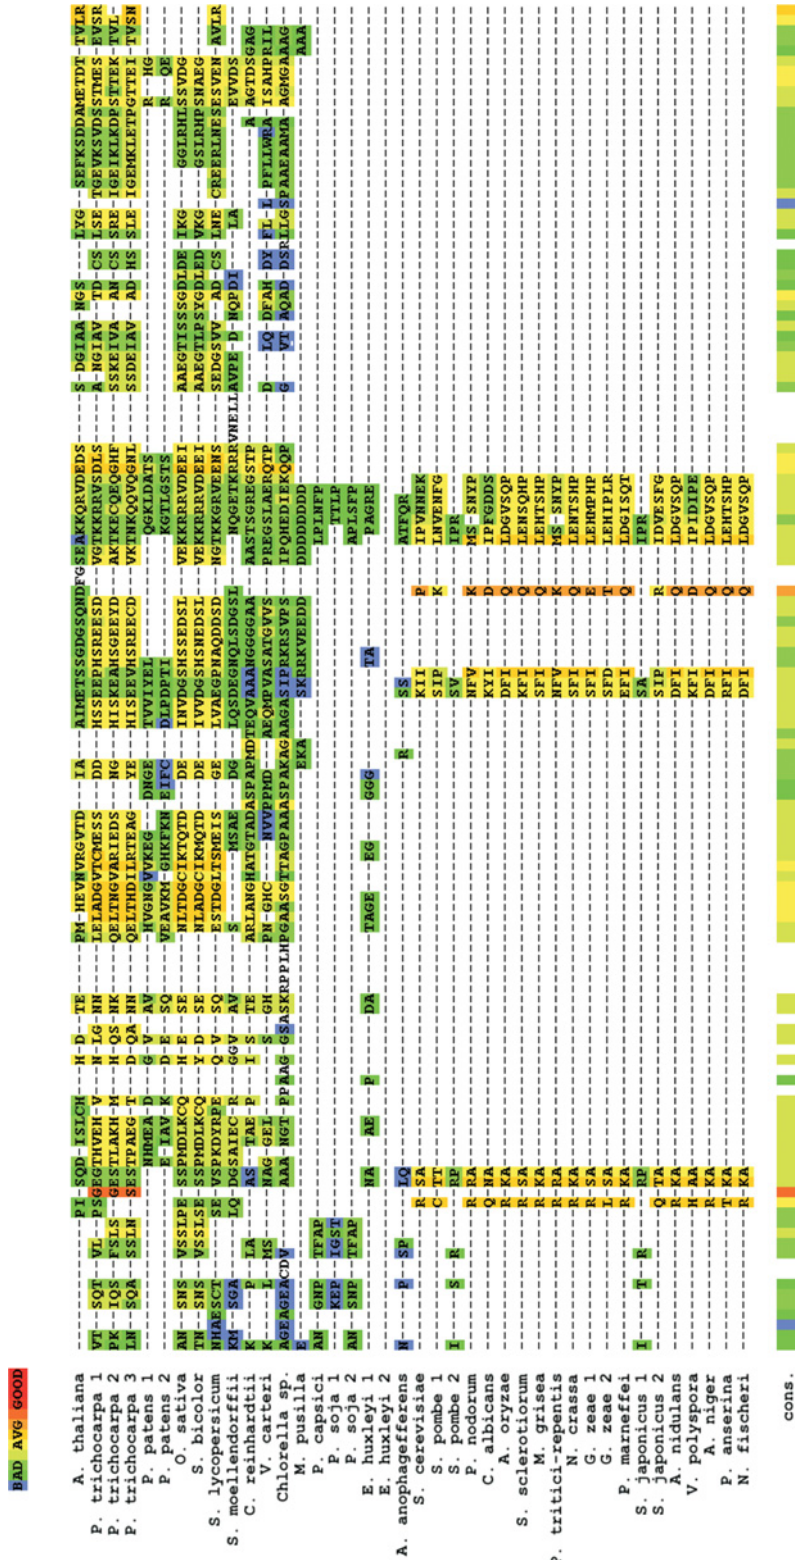

Figure S1 Continued

**second, inactive protease domain**

| Species             | Protein ID                                | Sequence                           | Conservation |
|---------------------|-------------------------------------------|------------------------------------|--------------|
| A. thaliana         | DFEGATLS                                  | AMASLAERAIETALVWVEVHPVPSCLDGVHNSOH | FFGGTIIIVHSS |
| P. trichocarpa 1    | DFGGKMTVT                                 | THASFEASVIEPTLVWVEVHPVQSLDGVHNSOH  | FFGGTIVVHNSO |
| P. trichocarpa 2    | MGHETAI                                   | STASFEASVIEPTLVWVEVHPVPSCLDGVHNSOH | SCGGTGVVHNSO |
| P. trichocarpa 3    | GEGAIATA                                  | THASFEASVIEPTLVWVEVHPVPSCLDGVHNSOH | ASGGTGVVHNSO |
| P. patens 1         | S-GIAPET                                  | SSSVAEYVIEPTLVWVEVHPVPSCLDGVHNSOH  | FFGGTIVVHNSO |
| P. patens 2         | S-GNAPVH                                  | SSSVAEYVIEPTLVWVEVHPVPSCLDGVHNSOH  | FFGGTIVVHNSO |
| O. sativa           | S-DLARTIS                                 | SHASLAEQVIEPTLVWVEVHPVPCMLDGVHNSOH | FFGGTIVVHNSO |
| S. bicolor          | S-ELARTIS                                 | SHASLAEQVIEPTLVWVEVHPVPCMLDGVHNSOH | FFGGTIVVHNSO |
| S. lycopersicum     | DEHVAAPVE                                 | ATSVAEYVIEPTLVWVEVHPVPSCLDGVHNSOH  | FFGGTIVVHNSO |
| S. moellendorffii   | Q--TPEVT                                  | GGASGVQVIEPTLVWVEVHPVPSCLDGVHNSOH  | FFGGTIVVHNSO |
| C. reinhardtii      | D-RQVCTAA                                 | SHSTLQTLRCCVILVWVDIPVVALSDGVHNSOH  | FAGHGLVYVAGE |
| V. carteri          | RESAAILA                                  | PACNDLDELRCVILVWVDIPVVALSDGVHNSOH  | FAGHGLVYVAGE |
| Chlorella sp.       | EAPADQEAAMRSMLEQLRCVILVWVDIPVVALSDGVHNSOH | FAGHGLVYVAGE                       |              |
| M. pusilla          | AAADQIEPVDAAEKVAVVPEPVALVVDVAVATADGVYVRS  | FFGGTIVVHNSO                       |              |
| P. capsici          | ---                                       | ---                                |              |
| P. soja 1           | ---                                       | ---                                |              |
| P. soja 2           | ---                                       | ---                                |              |
| E. huxleyi 1        | ---                                       | ---                                |              |
| E. huxleyi 2        | ---                                       | ---                                |              |
| A. anophagefferens  | ---                                       | ---                                |              |
| S. cerevisiae       | ---                                       | ---                                |              |
| S. pombe 1          | ---                                       | ---                                |              |
| S. pombe 2          | ---                                       | ---                                |              |
| P. nodorum          | ---                                       | ---                                |              |
| C. albicans         | ---                                       | ---                                |              |
| A. oryzae           | ---                                       | ---                                |              |
| S. sclerotiorum     | ---                                       | ---                                |              |
| M. grisea           | ---                                       | ---                                |              |
| P. tritici-repentis | ---                                       | ---                                |              |
| N. crassa           | ---                                       | ---                                |              |
| G. zeae 1           | ---                                       | ---                                |              |
| G. zeae 2           | ---                                       | ---                                |              |
| P. marneffei        | ---                                       | ---                                |              |
| S. japonicus 1      | ---                                       | ---                                |              |
| S. japonicus 2      | ---                                       | ---                                |              |
| A. nidulans         | ---                                       | ---                                |              |
| V. polyspora        | ---                                       | ---                                |              |
| A. niger            | ---                                       | ---                                |              |
| P. anserina         | ---                                       | ---                                |              |
| N. fischeri         | ---                                       | ---                                |              |
| cons.               | ---                                       | ---                                |              |

Figure S1 Continued



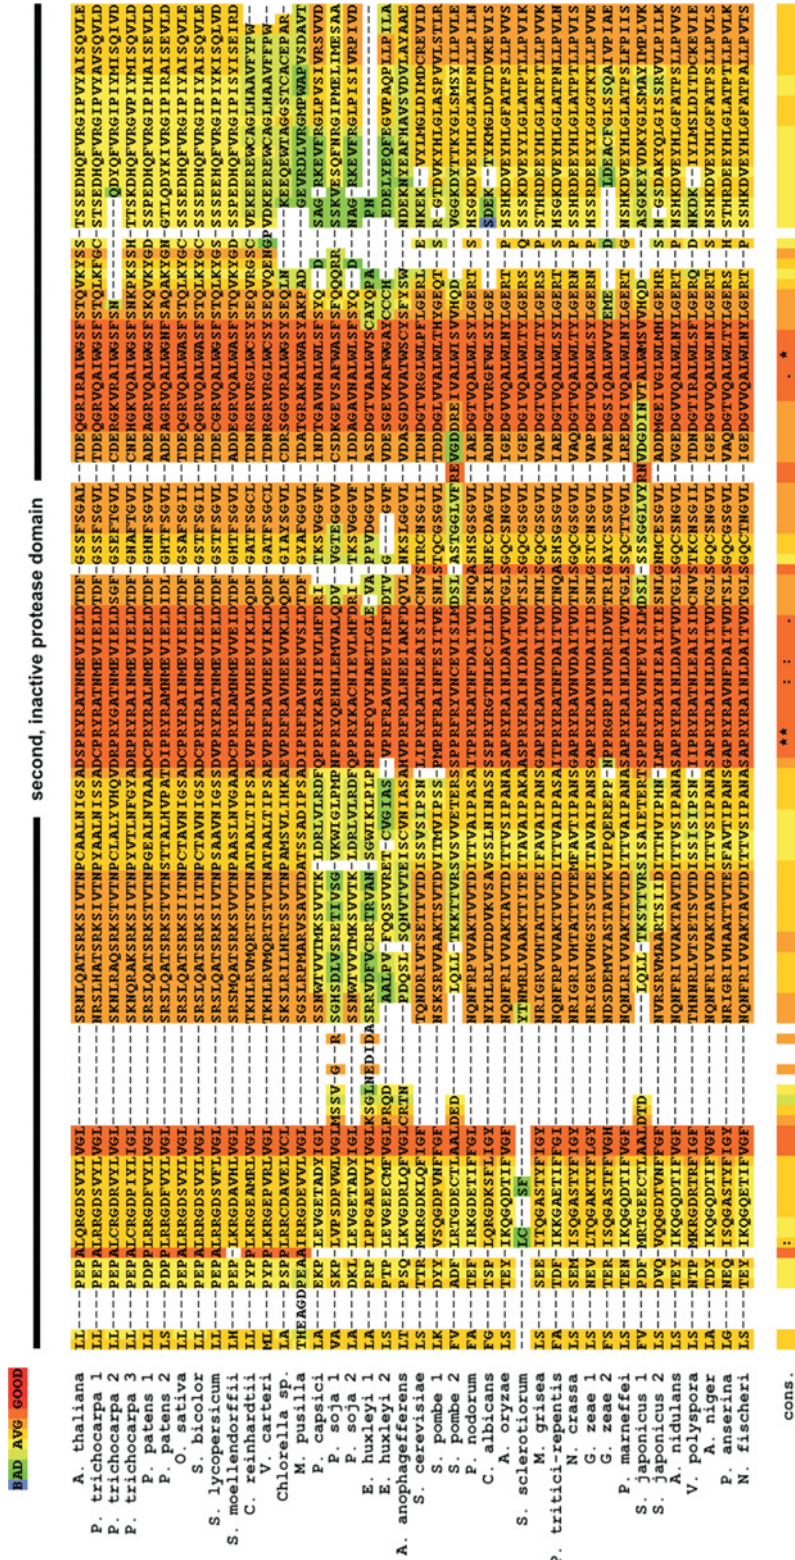

Figure S1 Continued



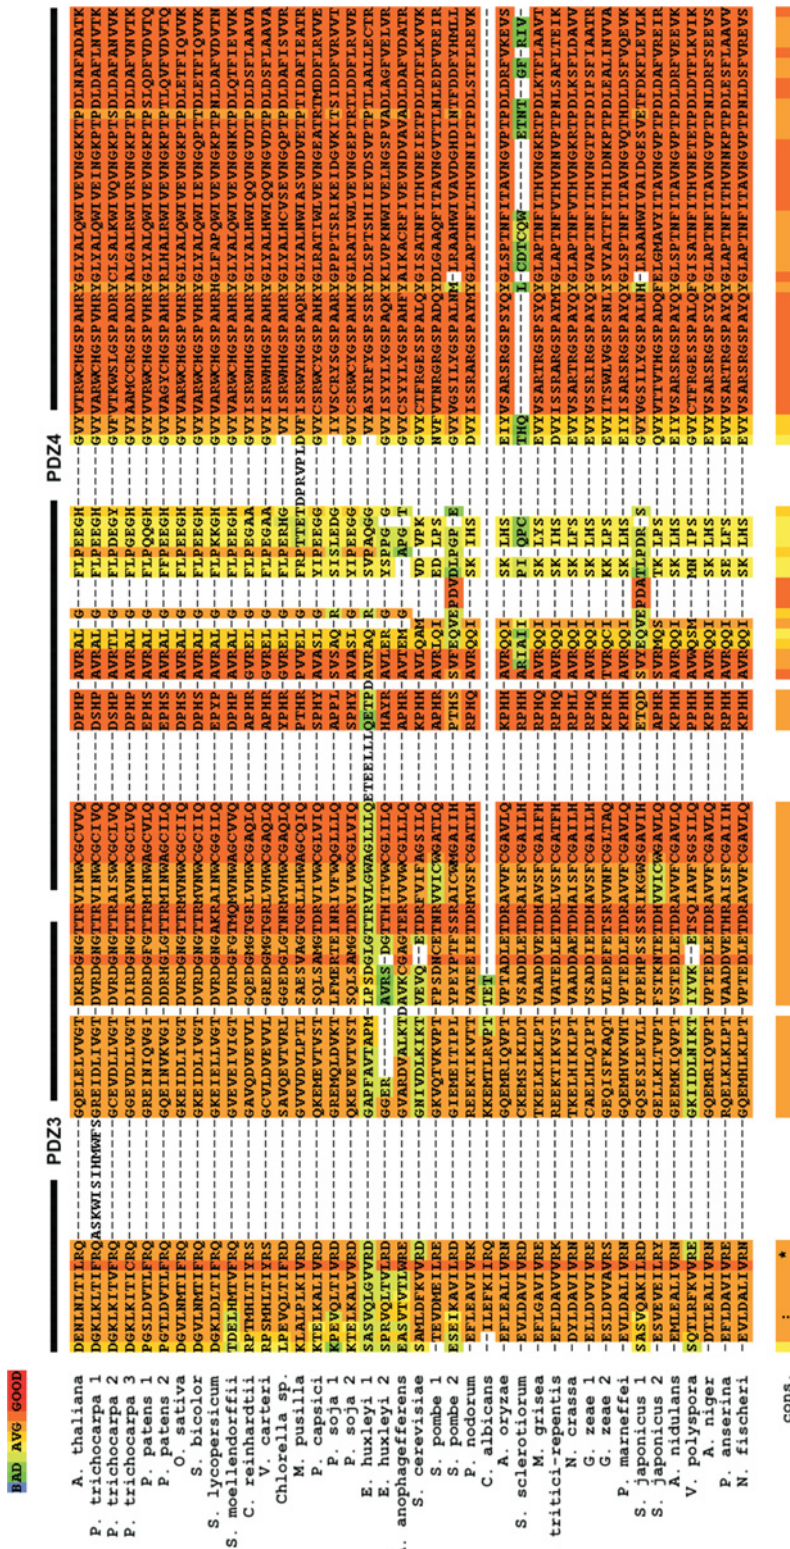

Figure S1 Continued

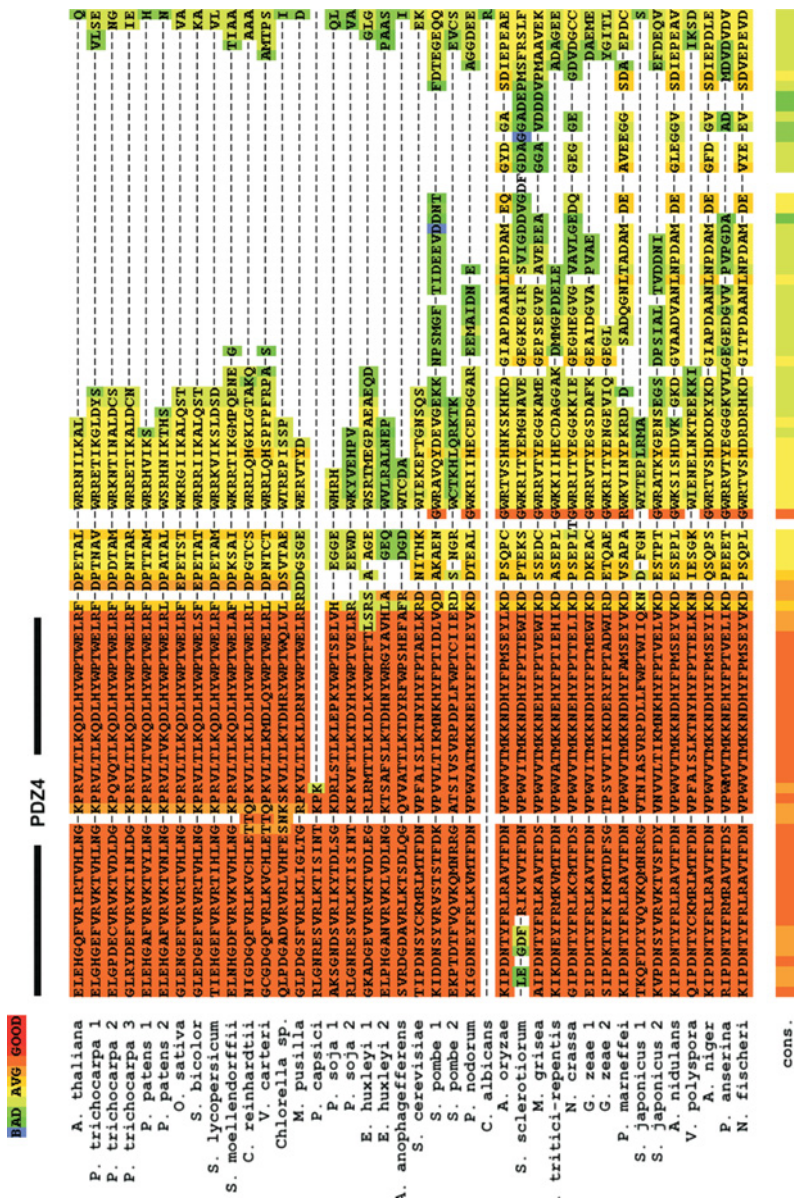

Figure S1 Continued

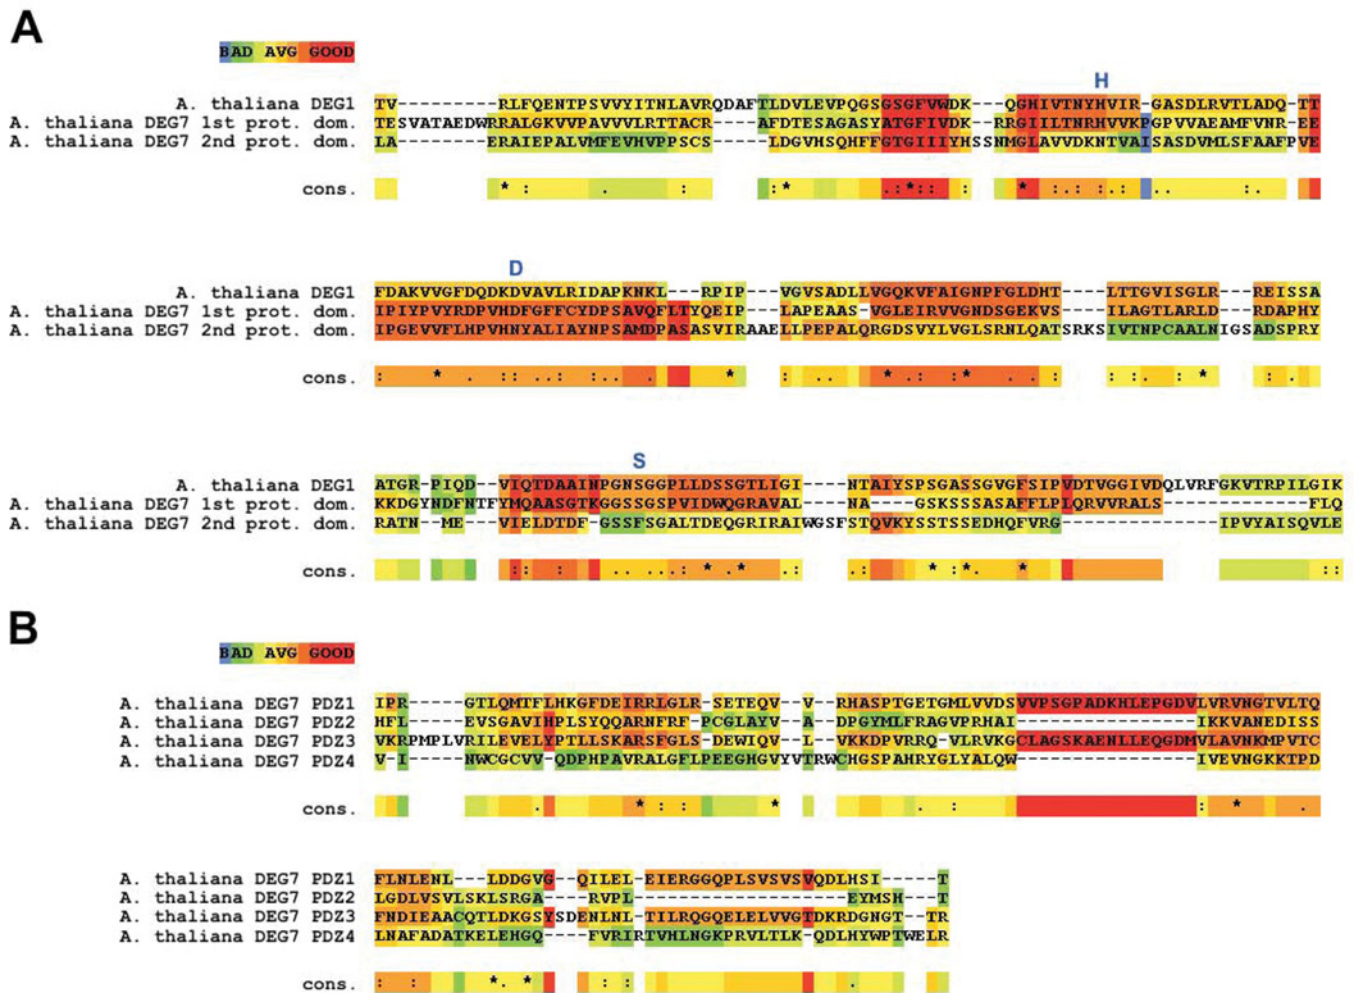

**Figure S2 M-Coffee multiple sequence alignment of the amino acid sequences of protease domains and PDZ domains of *A. thaliana* DEG7**

(A) Alignment of the first (active) protease domain (*A. thaliana* DEG7 1st prot. dom.) and the second (degenerate) protease domain (*A. thaliana* 2nd prot. dom.). The sequence of the protease domain of *A. thaliana* DEG1 is included to facilitate identification of catalytic side chains (shown in blue above the alignment). (B) Alignment of the PDZ domains. PDZ1 and PDZ3 both contain a stretch of additional amino acids not present in PDZ2 and PDZ4, indicating a whole-gene-duplication event as presented in Figure 1 of the main text. cons., consensus; \*, identity; ., conservative replacement; ,, non-conservative replacement.

© 2011 The Author(s)  
 The author(s) has paid for this article to be freely available under the terms of the Creative Commons Attribution Non-Commercial Licence (<http://creativecommons.org/licenses/by-nc/2.5/>) which permits unrestricted non-commercial use, distribution and reproduction in any medium, provided the original work is properly cited.

|                     |                                                                                         |
|---------------------|-----------------------------------------------------------------------------------------|
| A. thaliana         | AEDWR-RALGKVVPAVVVLRRTTACRAFDTESAGASYATGFIVDKRRGI ILTN                                  |
| G. max              | AEDWR-KALNRVVPVVVLRRTTATRSFDTESAAAASYATGFIVDKRRGI ILTN                                  |
| P. trichocarpa 1    | AEDWR-KALNKVVPAVVVLRRTTACRAFDTESAGASYATGFVVDKRRGI ILTN                                  |
| P. trichocarpa 2    | ADDWA-ETVNVKVVPAVVVLRRTTACRAFDTELPSSGSATGFVVDKQRGI ILTN                                 |
| P. trichocarpa 3    | TDDWR-DAINKVVPAVVVLRRTTACRSFDTELPSSGSATGFVVDKNRGI ILTN                                  |
| S. lycopersicum     | AEDWR-KALSKVVPAVVVLRRTTACRTFDTESAGCSSATGFVVDKRRGI ILTN                                  |
| P. patens 1         | AEDWR-KALNKVVPAVVVLRRTTATRAFDTEVAGASYSTGFVVDKRRGI ILTN                                  |
| P. patens 2         | AELWR-KALKKVVPAVVVLRITTTTRTFDTEVAGATHATGFVVDKQRGI ILTN                                  |
| O. sativa           | AEDWR-RALALVVPSVVVLRRTTAPRAFDTEVAGASYATGFVVDKSRGI ILTN                                  |
| S. bicolor          | AEDWR-RALSRVVPSVVVLRRTTAPRAFDTEVAGASYATGFVVDKSRGI ILTN                                  |
| S. moellendorffii   | AEDWQ-KSLARVVRGVVLRRTTACRAFDTEETASSGYATGFVVDKARSI ILTN                                  |
| C. reinhardtii      | PEDWK-RSLEKVVPCCVLKVVTQTRAFDTEAAGSAYATGFIVDKQRGLI ILTN                                  |
| V. carteri          | TEDWK-KALDRVVPCCVVLKVVTQTRAFDTEAAGSAYATGFIVDKQRGLI ILTN                                 |
| M. pusilla          | DATWQ-GVVRVSDGVVVIKTTGVRAFDTESAGSAYATGFVVDKARGVVL TN                                    |
| Chlorella sp. NC64A | SDAWK-TTLDAVVPVVVLRRTTQTRAFDTEAAGSAYATGFVVDKARGL I ILTN                                 |
| P. capsici          | SKRWL-ESLEKCI RAI VSI RILSVRAF DGN GAS FSVATGFVVDMERGL I ILTN                           |
| P. soja 1           | KLDWK-ATLERVVPVIVSLKLNPKFFDTESPGNGSATGFVVDKAEKGI ILTN                                   |
| P. soja 2           | SKRWL-QSLEKCI RAI VSI RLLSVRAF DGN GAS FSVATGFVVDMERGI I ILTN                           |
| E. huxleyi 1        | EESWD-RTIAAALPAVVAIKVNRVRAFDTASAGTVQATGFVVDKAEQGI ILTN                                  |
| E. huxleyi 2        | EKGWE-ETLERVAKGVVVRVNSVMAFDMNERGFSLATGFVVDKALGI ILTN                                    |
| A. anophagefferens  | RDVWE-RMLDRVLPVIVVIRVNYVKPFDDGQAGSAHATGFVVDKFERGI I VTN                                 |
| S. cerevisiae       | YLRWQ-NTISNVVKSIVSIHFSQVAPFD CDSALVSEATGFVVDKLG I ILTN                                  |
| S. pombe 1          | SKKWK-ESIARVVKSVSIRFSQVAAFDTDES G TGEASAFVVDKNGYMLSN                                    |
| S. pombe 2          | HHTWD-NTIKNVRSIVSIKGSALRSFDTESAGSFCATGFVVDKTLGL I LSN                                   |
| S. japonicus 1      | QPSWD-FTIKRVRSIVSIRGSVLRSDTENAGSFCATGFVVDKNLGI ILTN                                     |
| S. japonicus 2      | SGKWK-ESISRVVKSIVSIRFSQVASFDTDGAQTGEASAFIVDAENGYMMTN                                    |
| P. nodorum          | TAEWQ-KTIEGVVKSIVSIHFCQTC SFDTDP AISSEATGFVVDKAEKGI ILTN                                |
| C. albicans         | NNKWA-ETITNVVNCVSIHFSHVAPFDTENAVSSEATGFVVDASRGL I ILTN                                  |
| A. oryzae           | SPEWQ-ATIEEVVKSIVSIHFCQTC SFDT ELSMSSQATGFVVDKAEKGI ILTN                                |
| A. nidulans         | SPEWQ-ATIEEVVKSIVSIHFCQTC SFDT ELSMSSQATGFVVDKAEKGI ILTN                                |
| A. niger            | SPEWQ-ATIEEVVKSIVSIHFCQTC SFDT ELSMSSQATGFVVDKAEKGI ILTN                                |
| S. sclerotiorum     | TAEWQ-AAIEQVVRNVVSI R F C Q T C S F D T D P A L T S E A T G F V V D A E R G Y I L T N   |
| M. grisea           | TVEWQ-ATI QKVVS NVVSI R F C Q T C S F D T D A A L T S E A T G F V V D A E R G Y I L T N |
| P. tritici-repentis | TAEWQ-RTIENVVKSIVSIHFCQTC SFDTDAAVSSEATGFVVDKAEKGI ILTN                                 |
| N. crassa           | TAEWQ-ATIENVVRNVVSI R F C Q T C S F D T D P A L T S E A T G F V V D A E R G Y I L T N   |
| G. zeae 1           | LGEWQ-DTIQKVVRNVVAIRFCQTC SFDTDAALTSEATGYVVDSEKGI ILTN                                  |
| G. zeae 2           | SEAWQ-RAIEKVVRNVVSVKFSHPYSFDTEISK TSEATGFIVDAERGLVLTN                                   |
| P. anserina         | TAEWQ-ETIQRVVRNVVSI R F C Q T C S F D T D P A L T S E A T G F V V D A E R G Y I L T N   |
| N. fischeri         | SPEWQ-ATIEKVVKSIVSIHFCQTC SFDT DLSMSSQATGFVVDKAEKGI ILTN                                |
| P. marneffeii       | SPEWQ-ATIESVVKSIVSIHFCQTC SFDT DMSMCSQATGFVVDKAEKGI ILTN                                |
| V. polyspora        | YLKWQ-NTIAKVVKSIVSIHFSQVAPFDSDNAVVSQATGFVVDASLGI ILTN                                   |
| EcDegP              | DSPFCQEG-SPFQSSPFCQGGQGGGGQQKFMALGSGV I I DADKGYVVTN                                    |
| HsHtrA2             | QYNFIADVVEKTAPAVVYIEILDRHPFLGREVPI SNGSGFVVAAD-GLIVTN                                   |
| AtDEG1              | TVRLFQENTPSVVYITNLAVRQDAFTLDVLEVPQSGSGFVVDKQ-GHIVTN                                     |
|                     | . . . : . . . : : *                                                                     |

**Figure S3 Alignment of the amino acid sequences of the active protease domains of DEG7 proteins from higher plants, mosses, algae and fungi**

Amino acid sequences of DEG7 active protease domains were aligned with those of the protease domains of DegP from *Escherichia coli* (EcDegP), human HtrA2 (HsHtrA2) and Deg1 from *Arabidopsis thaliana* (AtDEG1) as described in the Experimental section of the main text. For full names of organisms, see Supplementary Table S1. Identical residues are indicated by asterisks. Active-site residues of the catalytic triad are in bold. Conservative replacements are indicated by : symbols; non-conservative replacements are indicated by . symbols.

Continues...

|                     |                                            |                      |     |
|---------------------|--------------------------------------------|----------------------|-----|
| A. thaliana         | RHVVKPGPVVAEAMFVNREEIPIYVPYRDPVHD          | FGFFCYDPSAVQF---     | LTY |
| G. max              | RHVVKPGPVVAEAMFLNREEVPVHPIYRDPVHD          | FGFFRYDPGAIQF---     | LNY |
| P. trichocarpa 1    | RHVVKAGPVVAEAMFLNREEIPVYPIYRDPVHD          | FGFFRYDPGAIQF---     | LNY |
| P. trichocarpa 2    | RHVVNPGPVNAQAI FVSNEETPLRPIYRDPVHD         | FGFFSYDPGAIQF---     | LNY |
| P. trichocarpa 3    | RHVVKPGPVVAQAI FVNNEEIPVYPIYRDPVHD         | FGFFRYDPSAIQF---     | HKY |
| S. lycopersicum     | RHVVKPGPVMAEAMFVNREEIPVYPIYRDPVHD          | FGFFRYDPGAIQF---     | LSY |
| P. patens 1         | RHVVKPGPIVAEAMFVNREEISVYPLYRDPVHD          | FGFLWFDP SLVQF---    | LDY |
| P. patens 2         | RHVVKPGPVVAEAMFVNREEILVYPLYRDPVHD          | FGFFRYDPGAIKF---     | LKY |
| O. sativa           | RHVVKPGPVVAEAMFVNREEIPVYPLYRDPVHD          | FGFFRYDPGAIKF---     | LKY |
| S. bicolor          | RHVVKPGPVVAEAMFVNREEIPVYPLYRDPVHD          | FGFFRYDPGAIKF---     | LKY |
| S. moellendorffii   | RHVVKPGPVVAEAI FLNREEIPVYPLYRDPVHD         | FGFFRFDPKSV EF---    | MNY |
| C. reinhardtii      | RHVVTGPIVAEAI FLNREELPVVPLYDPIHD           | FGFLRFDP SRLQF---    | MEV |
| V. carteri          | RHVVTGPIVAESI FLNREELPVVPLYDPIHD           | FAFLRFDP SRLQF---    | MEV |
| M. pusilla          | RHVCRPGPVTA EAVFQNREEVPLRALYSDPVHD         | FAMRFDP SLVKF---     | QKV |
| Chlorella sp NC64A  | RHVVTGPGPVVAEAI FLNREEVPVQPLYDPIHD         | FGFMRFDP SRLQF---    | MKA |
| P. capsici          | RHVVTGPGPVVADAI FLNKEEVDLVPYRDPVHD         | FGFYRFDPK KVKF---    | LQL |
| P. soja 1           | RHVVGPGPIDAEAVFQNEEVRVIPIYRDPVHD           | FGFFQFN PADVKH---    | MSV |
| P. soja 2           | RHVVTGPGPVVADAI FLNKEEVDLVPYRDPVHD         | FGFFRFDPK KVKF---    | LQL |
| E. huxleyi 1        | RHVAGPGPVVAEAI FQNNEEVSLSLAYDPIHD          | FAFFRFDP SALRH---    | MKP |
| E. huxleyi 2        | RHVVTGPGVTA DAVLHNKEEIELTPLYADPVHD         | FGFFKYDP ADVRF---    | MEL |
| A. anophagefferens  | RHVIGTGPIRAEATFVTKEEVPLTPLYRDPVHD          | FGFFHFDA AHLKYAGELQA |     |
| S. cerevisiae       | RHVVGPGPFVGYVFDNHEECDVPIYRDPVHD            | FGFLKFDPKNIKY---     | SKI |
| S. pombe 1          | RHVVCAGPFVGHAVFDNHEEVEVFPYRDPVHD           | FGFLRFDPK KIRY---    | MNV |
| S. pombe 2          | RHVVSPPGISARASFINYEEIDIYPIYRDPVHD          | FGFFRYDPSSIRF---     | HDV |
| S. japonicus 1      | RHVVSPPITARASFINYEEIDIYPLYRDPVHD           | FGFFRYNPSALRF---     | HEV |
| S. japonicus 2      | RHVACAGPFVGRAVLDNHEEVEVPIYRDPVHD           | FGILKFDPK KIRY---    | MKV |
| P. nodorum          | RHVVGAGPFIGYCIFDNHEECDVYPYRDPVHD           | FGILRFDPK AIKY---    | MSV |
| C. albicans         | RHVVGPGPFVTGYVFDNHEESVDVKPIFRDPIHD         | FGILKFN PQDVKY---    | LKL |
| A. oryzae           | RHVVCPGPFWG YCIFDNHEECDVRPYRDPVHD          | FGILKFDPK AIRY---    | MNL |
| A. nidulans         | RHVVCPGPFWG YVIFDNHEECDVYPYRDPVHD          | FGFLKFDPK AIRH---    | MKL |
| A. niger            | RHVVCPGPFWG YCIFDNHEECDVRPYRDPVHD          | FGILKFDPK AIRY---    | MKL |
| S. sclerotiorum     | RHVVGSGPFWG YCVFDNHEEVDAYPYRDPVHD          | FGILRFDPK AIKY---    | MPV |
| M. grisea           | RHVVGSGPFWG YCIFDNHEEVDAYPYRDPVHD          | FGILKFDPK AIKY---    | MPV |
| P. tritici-repentis | RHVVGAGPFIGYCIFDNHEECDVHPYRDPVHD           | FGILRFDP SKIKY---    | MPV |
| N. crassa           | RHVVGSGPFWG YCIFDNHEEVDAYPYRDPVHD          | FGILKFDPK AIKY---    | MPV |
| G. zeae 1           | RHVVGAGPFWGHCVFDNHEEVDVCPYRDPVHD           | FGILRYDPK AIKY---    | MHI |
| G. zeae 2           | RHVVGPGPFSGYIVFNQEEVEVHPIYRDPVHD           | FGFLKFDPK AVKY---    | MEL |
| P. anserina         | RHVVGSGPFWG YCVFDNHEEVDAYPYRDPVHD          | FGILKFDPK AIKY---    | MPV |
| N. fischeri         | RHVVCAGPFWG YCIFDNHEECDVRPYRDPVHD          | FGILKFDPK AIRY---    | MEL |
| P. marneffeii       | RHVVCAGPFWG YCIFDNHEECDVRPYRDPVHD          | FGILKFDPK AIKY---    | MDM |
| V. polyspora        | RHVVGPGPFVGYAVFDNHEECDVTPYRDPVHD           | FGFLKFDPT KIKY---    | MNI |
| EcDegP              | NHVV-DNATVIKVLSDGRKFDKAMVGKDP RSDIALIQIQ-- | NPKN-----            | L   |
| HsHtrA2             | AHVV-ADRRRRVRRLSGDTYEAVVTAVDPVAD IATLRIQ-- | TKEP-----            | L   |
| AtDEG1              | YHVI-RGASDLRVTLADQTTFDAKVVGFQDKD VAVLRID-- | APKN-----            | KL  |
|                     | ** :                                       | * * . :              | .   |

Figure S3 Continued

```

A. thaliana      QEIPLAPEAA-SVGLEIRVVGNDGSEKVSILAGTLARL-----DRD
G. max          EEIPLAPEAA-CVGLEIRVVGNDGSEKVSILAGTLARL-----DRD
P. trichocarpa 1 EEIPLAPEAA-CVGLEIRVVGNDGSEKVSILAGTLARL-----DRD
P. trichocarpa 2 EEIPLAPEAA-SVGLEIRVIGNDSSEKVSILSGILARL-----DRN
P. trichocarpa 3 EEIPLAPEAA-SVGLEIRVIGNDSCEKVSILAGTLARL-----DRN
S. lycopersicum EEIPLAPDAA-SVGVEIRVVGNDGSEKVSILAGTLARL-----DRD
P. patens 1     EEIPLAPDAA-QVGLEIRVVGNDGSEKVSILAGTLARL-----DRD
P. patens 2     EEIPLAPDAA-AVGLEIRVVGNDGSEKVSILAGTLARL-----DRD
O. sativa       DEIPLAPEAA-SVGLEIRVVGNDGSEKVSILAGTLARL-----DRE
S. bicolor      DEIPLAPEAA-SVGLEIRVVGNDGSEKVSILAGTLARL-----DRE
S. moellendorffii EEIPLAPEAA-AVGLEIRVVGNDGSEKLSILAGTIARL-----DRD
C. reinhardtii  SEVPLAPEGA-TVGLDIRVVGNDGSEKVSILAGTLARL-----DRD
V. carteri      SEVPLAPEAA-TVGLDIRVVGNDGSEKVSILAGTLARL-----DRD
M. pusilla      TDVPLAPDGA-AVGLEIRVVGNDGSEKLSILSATLARLGAFYTLVPIRPHRD
Chlorella sp. NC64A GEIPLAPDAA-AVGLEIRVVGNDGSEKLSILSGTLARL-----DRD
P. capsici      HEIPLRPEAA-KIGAEIRVVGNDAGEKLSILPGILAKM-----DRD
P. soja 1       PSLRLEPKA-TVGTDIRVVGNDAAEKLAIASGTLARL-----DRD
P. soja 2       HEIPLRPEAA-KIGAEIRVVGNDAGEKLSILPGILAKL-----DRD
E. huxleyi 1    TELRLAPEQA-EVTSEILIIGNNAGEKCSIHRTTLARL-----DRN
E. huxleyi 2    QEIPLAPSEA-RV-----RVVGNDAGEKISILSGTIARL-----DRA
A. anophagefferens AAIELAPEKA-KVGLEIRVVGNDAGEKVSILSGTLARL-----DRN
S. cerevisiae   KALTLKPSLA-KVGSEIRVVGNDAGEKLSILAGFISRI-----DRN
S. pombe 1      EQLELRPDLA-KVGTEIRVVGNDAAEKLSILAGWISRI-----DRN
S. pombe 2      TEISLSPESA-KVGIDIRIIGNDAGEKLSILSSTLARL-----DRP
S. japonicus 1  DEIPLAPELA-RVGADIRVIGNDAGEKLSILSSTLARL-----DRA
S. japonicus 2  QQLEMRPDLA-KVGKEIRVVGNDAAEKLSILAGWISRV-----DRN
P. nodorum      SALQLRPDFA-KVGVEIRVVGNDAGEKLSILSGVISRL-----DRN
C. albicans     TQLELAPDLA-KVGTEIRVVGNDAGEKLSILSGFISRL-----DRN
A. oryzae       TELKLQPDAA-RVGSEIRVVGNDAGEKLSILSGVISRL-----DRN
A. nidulans     RELKLQPDGA-RVGSEIRVVGNDAGEKLSILSGVISRL-----DRN
A. niger        RELKLQPDAA-KVGSEIRVVGNDAGEKLSILSGVISRL-----DRN
S. sclerotiorum TALGLRPDLA-KVGSEIRVVGNDAGEKLSILSGVISRL-----DRN
M. grisea       AALPLRPDLA-KVGVEIRVVGNDAGEKLSILSGVISRL-----DRN
P. tritici-repentis TALKLRPDNA-KVGVEIRVVGNDAGEKLSILSGVISRL-----DRN
N. crassa       AALPLRPDLA-RVGIEIRVVGNDAGEKLSILSGVISRL-----DRN
G. zeae 1       DGLELRPDLA-KVGTEIRVVGNDAGEKLSILSGIISRL-----DRN
G. zeae 2       TAMQLRPDLA-KVGTEIKVIGNDSGEKLGILSGFISRL-----DRN
P. anserina     EALQLRPDLA-KVGIEIRVVGNDAGEKLSILSGVISRL-----DRN
N. fischeri     TELKLRPEAA-RVGCEIRVVGNDAGEKLSILSGVISRL-----DRN
P. marneffeii  TELKLNPDGA-QVGVEIRVVGNDAGEKLSILSGVISRL-----DRN
V. polyspora    QALELKPSLA-KVGSEIRVVGNDAGEKLSILSGFISRL-----DRN
EcDegP         TAIKMADSDALRVGDYTVAIIGNPFGLGETVTSIVSAL-----GRS
HsHtrA2        PTLPLGRSADVRQGEFVAMGSPFALQNTITSGIVSSA-----QRP
AtDEG1         RPIPVGVSADLLVGQKVFVFAIGNPFGLDHTLTGIVSGL-----RRE
: : .          :* .      :   ::          *

```

Figure S3 Continued



|                     |                                                         |
|---------------------|---------------------------------------------------------|
| A. thaliana         | APHYKKGNDYNDNFNTFYMQAASGTKGGSSGSPVIDWQGRAVALNAGSKSS-SA  |
| G. max              | APHYKKGNDYNDNFNTFYMQAASGTKGGSSGSPVIDWQGRAVALNAGSKSS-SA  |
| P. trichocarpa 1    | APHYKKGNDYNDNFNTFYMQAASGTKGGSSGSPVIDWQGRAVALNAGSKSS-SA  |
| P. trichocarpa 2    | APAYEKDGYNDNFNTFYLQAASGTPKPGSSGSPVIDKQGRAVALNAGSSSS-SS  |
| P. trichocarpa 3    | APTYRRDGYNDNFNTFYMQAASGTKRGGSSGSPVIDKQGRAVALNAGGSVS-SS  |
| S. lycopersicum     | APQYKKGNDYNDNFNTFYMQAASGTKGGSSGSPVIDWQGRAVALNAGSKLS-SA  |
| P. patens 1         | APHYKKGNDYNDNFNTFYMQAASGTKGGSSGSPVIDIHGRAVALNAGSKSA-SA  |
| P. patens 2         | APHYKSTGYNDNFNTFYMQAASGTKRGGSSGSPVIDIYGQAVLNAGSRSS-SA   |
| O. sativa           | APYYKKGNDYNDNFNTFYMQAASGTKGGSSGSPVVDCCQGRAVALNAGSKSS-SA |
| S. bicolor          | APYYKKGNDYNDNFNTFYMQAASGTKGGSSGSPVVDCCQGRAVALNAGSKSS-SA |
| S. moellendorffii   | APPYKKGNDYNDNFNTFYMQAASGTKGGSSGSPVVDCKGRAVAINAGSKVA-GA  |
| C. reinhardtii      | APVYGRKGYNDNFNTFYLQAASGTKGGSSGSPVIDCQGRAVGLNAGGKNA-AA   |
| V. carteri          | APVYGRKGYNDNFNTFYLQAASGTKGGSSGSPVIDCQGRAVGLNAGGKNA-AA   |
| M. pusilla          | APKYGSKGYNDNFNTFYIQAASGTKGGSSGSPVVDVNGRAVALNAGSKTK-GS   |
| Chlorella sp. NC64A | APHYSRRGFNDFNFNTFYIQAASGTKGGSSGSPVVDVNGRAVALNAGGKNA-AA  |
| P. capsici          | APSYGSSSYNDNFNTFYFAAASSTSGGSSGSPVLNIDGCAIALNAGGAKK-SA   |
| P. soja 1           | APNYGYNNDYNDNFNTFYQASSGTTGGSSGSPVLNHDGDAIALNAGGKIG-TS   |
| P. soja 2           | APSYGSGSYNDNFNTFYFAAASSTSGGSSGSPVLNIDGCAIALNAGGAKK-AA   |
| E. huxleyi 1        | APHYSRSSYNDNFNTFYFHSASGTSGGSSGSPVLNKRGSIAIALNAGGKSG-TS  |
| E. huxleyi 2        | APNYGSHTYNDNFNTFYFSCASNTSGGSSGSPVVDVNGRAVALNAGTSTK-SA   |
| A. anophagefferens  | APHYQSDGFNDFNTFYISAASNTSGGSSGSPVLDSSGRAVALNAGGSNN-SS    |
| S. cerevisiae       | APEYGELTYNDNFNTFYIQAASASGGSSGSPVVDVNGRAVALNAGGSTE-AS    |
| S. pombe 1          | VPDYGELTYCDFNTFYIQAASASGGSSGSPVVDVNGRAVALNAGGSTE-AS     |
| S. pombe 2          | APNYGIDNYNDNFNTFYIQAASGTSGGSSGSPVLDISGAAVALNAGGSNS-SA   |
| S. japonicus 1      | APNYGVDSYNDNFNTFYIQAASGTSGGSSGSPVLDISGAAVALNAGGSNK-SA   |
| S. japonicus 2      | VPEYGEYTYCDFNTFYIQAASASGGSSGSPVVDVNGRAVALNAGGSTE-AS     |
| P. nodorum          | APEYGE-GYSDFNTNYIQAASASGGSSGSPVVDVNGRAVALNAGGSTE-AS     |
| C. albicans         | APDYGSLTYNDNFNTFYIQAASASGGSSGSPVVDVNGRAVALNAGGSTE-AS    |
| A. oryzae           | APEYGE-GYSDFNTNYIQAASASGGSSGSPVVDVNGRAVALNAGGSTE-AS     |
| A. nidulans         | APEYGD-GYSDFNTNYIQAASASGGSSGSPVVDVNGRAVALNAGGSTE-AS     |
| A. niger            | APEYGD-GYSDFNTNYIQAASASGGSSGSPVVDVNGRAVALNAGGSTE-AS     |
| S. sclerotiorum     | APEYGD-GYCDFNTNYIQAASASGGSSGSPVVDVNGRAVALNAGGSTE-AS     |
| M. grisea           | APEYGE-GYSDFNTCYIQAASASGGSSGSPVVDVNGRAVALNAGGSTE-AS     |
| P. tritici-repentis | APEYGE-GYSDFNTNYIQAASASGGSSGSPVVDVNGRAVALNAGGSTE-AS     |
| N. crassa           | APEYGD-GYSDFNTCYIQAASASGGSSGSPVVDVNGRAVALNAGGSTE-AS     |
| G. zeae 1           | APEYGE-GYSDFNTCYIQAASASGGSSGSPVVDVNGRAVALNAGGSTE-AS     |
| G. zeae 2           | APIY-D-GYMDFNTCYIQAASASGGSSGSPVVDVNGRAVALNAGGSTE-AS     |
| P. anserina         | APEYGE-GYSDFNTCYIQAASASGGSSGSPVVDVNGRAVALNAGGSTE-AS     |
| N. fischeri         | APEYGD-GYCDFNTNYIQAASASGGSSGSPVVDVNGRAVALNAGGSTE-AS     |
| P. marneffeii       | APEYGE-GYSDFNTNYIQAASASGGSSGSPVVDVNGRAVALNAGGSTE-AS     |
| V. polyspora        | APDYGELTYNDNFNTFYIQAASASGGSSGSPVVDVNGRAVALNAGGSTE-AS    |
| EcDegP              | GLN-AEN-Y----ENFIQTDAAINRGNSSGALVNLNDELIGINTAILAPDGG    |
| HsHtrA2             | ARDLGLPQT---NVEYIQTDAIDFGNSSGGLVNLNDELIGINTAILAPDGG     |
| AtDEG1              | ISSAATGRP---IQDVIQTDAAINPGNSSGGLLDSSGTLIGINTAIYSPSGA    |
|                     | : *.**..... * :....                                     |

Figure S3 Continued

```

A. thaliana      S---AFFLPLQRVVRALSFLQKS-----I
G. max           S---AFFLPLERVVRALRFLQKGS-----E
P. trichocarpa 1 S---AFFLPLERVVRALEFLQK-----
P. trichocarpa 2 S---AFYLPLERVVRALRLLQKC-----K
P. trichocarpa 3 S---AFYLHLERVVRALAFQKS-----K
S. lycopersicum S---AFFLPLERVVRSKFLQE-----
P. patens 1     S---AFFLPLERVVRALHLLQAQ-----K
P. patens 2     S---AFFLPLERVVRALHLLQE-----K
O. sativa       S---AFFLPLERVVRALNLIRD-----
S. bicolor      S---AFFLPLERVVRALNLIRDS-----W
S. moellendorffii S---AYFLPLDRVVRALRILQES-----K
C. reinhardtii  S---AYYLPLERVVRALKLIQAS-----K
V. carteri      S---AYYLPLERVVRALKLIQASKDAFRPGTEWP-C---PF--IP
M. pusilla      A---AYYLPLHRVVRALDLLRDACP-----A--NP
Chlorella sp. NC64A S---AYYLPLHRIVRALHLLQACHQ---PDGSWA-Q---PA--IP
P. capsici      A---SFYLPLDRVVRVRLRIQQGNP-----VP
P. soja 1       A---SFYLPLDRVKRAFDLIREAET-----IP
P. soja 2       S---SFYLPLDRVVRVGLIQQGQP-----VP
E. huxleyi 1    A---GFFLPLDRVARALELLRSGAA-----VP
E. huxleyi 2    S---SYFLPLQRPARALALLQKALLAGRGAG---R---AC--VP
A. anophagefferens A---SYFLPLHAVVRALDALKAG-----V
S. cerevisiae   T---DFFLPLDRILRALICIQTNKP-----IT
S. pombe 1      T---DYFLPLDRPLRALRCLQNNTP-----IT
S. pombe 2      S---SFYLPLDRVVRALRCIENNT-----IT
S. japonicus 1 S---SFYLPLDRVVRALHCIQNNKS-----IT
S. japonicus 2 T---DYFLPLDRPLRALRCLQNNKP-----IT
P. nodorum      T---DYFLPLDRPLRALLELVRRGEA-----VT
C. albicans     T---DYFLPVYRPLRALRCIQNNEP-----IT
A. oryzae       T---DYFLPLDRPLRALECIIRGEP-----VT
A. nidulans     T---DYFLPLDRPLRALECIIRGEP-----VT
A. niger        T---DYFLPLDRPLRALECIIRGEP-----VT
S. sclerotiorum T---DYFLPLDRPLRALQCIQQGKP-----IT
M. grisea       T---DYFLPLDRPLRALQCLQQGKP-----IT
P. tritici-repentis T---DYFLPLDRPLRALELIRQQGF-----VS
N. crassa       T---DYFLPLDRPLRALKCLQEGKP-----IT
G. zeae 1       T---DYFLPLDRPLRALQCIQNGKP-----VT
G. zeae 2       T---DYFLPLDGPLRALKQIQNGGK-----VK
P. anserina     T---DYFLPLDRPLRALKCLQEGNP-----IT
N. fischeri     T---DYFLPLDRPLRALECIIRGEP-----VA
P. marneffei    T---DYFLPLGRPLRALQCLQEGKP-----VT
V. polyspora    T---DFFLPLDRILRALKCLQSNKP-----IT
EcDegP         NIGIGFAIPSNMVKNLTSQMVEYGQVK-----RG-E---LGIMGT
HsHtrA2        -AGISFAIPSDRLREFLHRGEKKNSSG-----ISGSQRRYIG--VM
AtDEG1         SSGVGFSPVDTVGGIVDQLVRFQKVT-----RP-I---LG--IK
: :

```

Figure S3 Continued

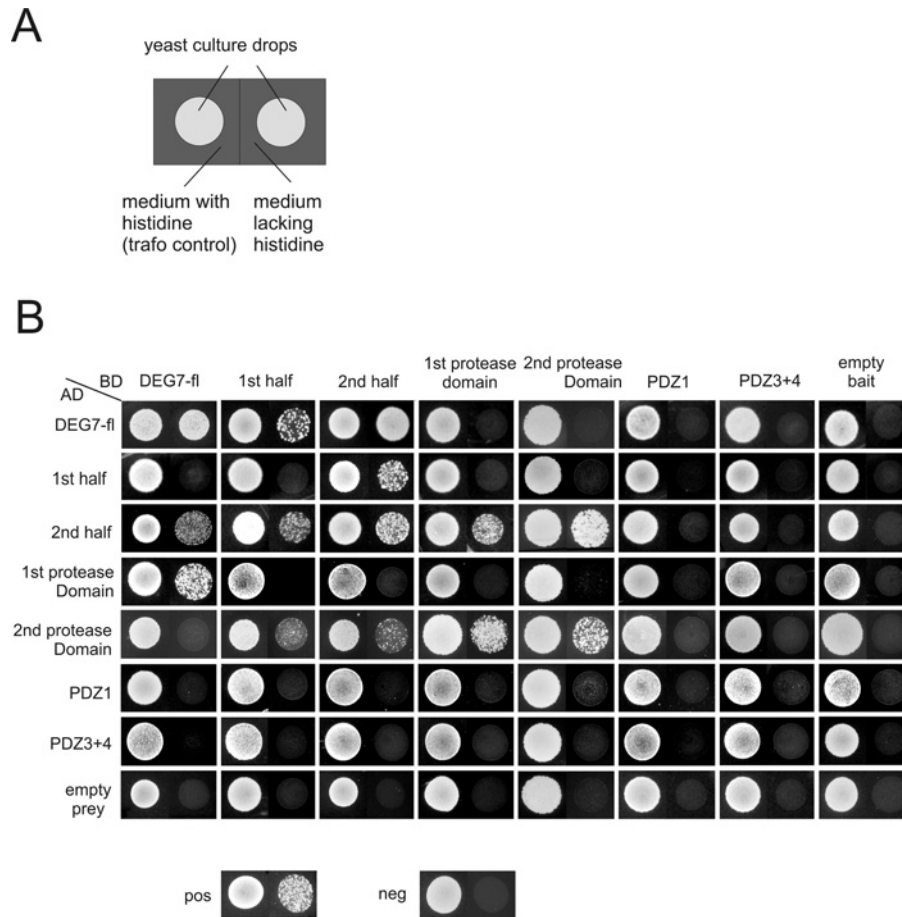

**Figure S4 Y2H assay shows that oligomerization of DEG7 is mediated by the second (degenerated) protease domain (extended version)**

(A) Schematic outline of the experiment. Yeast drop cultures on medium containing histidine, but lacking tryptophan and leucine were used as transformation controls, indicating that the strain contains both the AD and the BD vector. (B) Y2H assay as summarized in Table 1 and Figure 4 of the main text. Empty AD and BD vectors were used as autoactivation controls. Every yeast strain growing on histidine-free medium contains the second protease domain in at least one construct. The AD–first half, BD–first half, AD–active protease domain, and BD–active protease domain constructs respectively mediated growth on histidine-free medium in at least some combinations, indicating that lack of gene expression in the combinations first half/first half and active protease domain/active protease domain is not due to a lack of protein expression. pos, positive control; neg, negative control.

Received 1 October 2010/19 January 2011; accepted 19 January 2011  
 Published as BJ Immediate Publication 19 January 2011, doi:10.1042/BJ20101613
